# Supplementary material for: Syntheses, crystal structures, magnetochemistry and catechol oxidase activity of a tetracopper(ii) compound and a new type of dicopper(ii)-based 1D coordination polymer
Source: Royal Society of Chemistry journal article supplement (doi:10.1039/c7nj00286f), 2017-01-01
Supplement: c7nj00286f1.pdf [file c7nj00286f1.pdf]

**Electronic Supplementary Informations**

**For**

**Syntheses, crystal structures, magnetochemistry and catechol oxidase activity of a tetracopper(II) compound and a new type of dicopper(II)-based 1D coordination polymer**

**Leena Mandal, Shuvankar Mandal and Sasankasekhar Mohanta\***

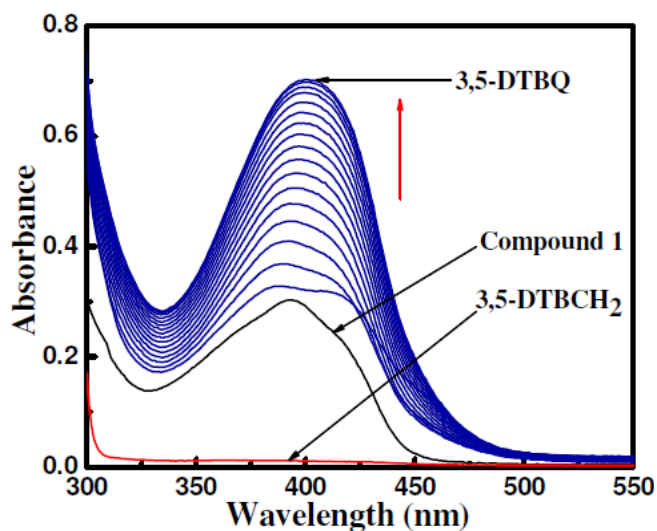

**Fig. S1** The spectral profile showing the increase of quinone band at 400 nm after the addition of 100 fold of 3,5-DTBCH<sub>2</sub> to a solution containing complex [Cu<sub>4</sub>L<sub>2</sub>(μ<sub>3</sub>-OH)<sub>2</sub>(NCO)<sub>4</sub>].2H<sub>2</sub>O (**1**) (0.25×10<sup>-4</sup> M) in DMF. The spectra were recorded after every 5 min.

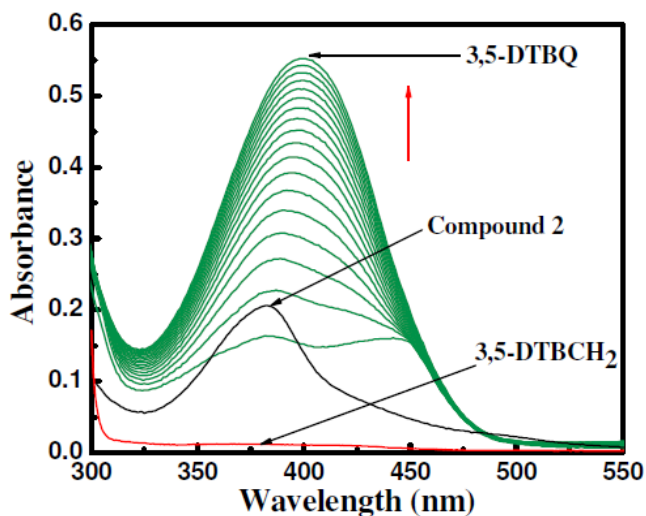

**Fig. S2** The spectral profile showing the increase of quinone band at 400 nm after the addition of 100 fold of 3,5-DTBCH<sub>2</sub> to a solution containing complex [Cu<sub>2</sub>L(μ<sub>1,1</sub>-N<sub>3</sub>)<sub>2</sub>(μ<sub>1,1</sub>-N<sub>3</sub>)<sub>2</sub>](μ<sub>1,3</sub>-N<sub>3</sub>)<sub>2</sub> (**2**) (0.25×10<sup>-4</sup> M) in acetonitrile. The spectra were recorded after every 5 min.

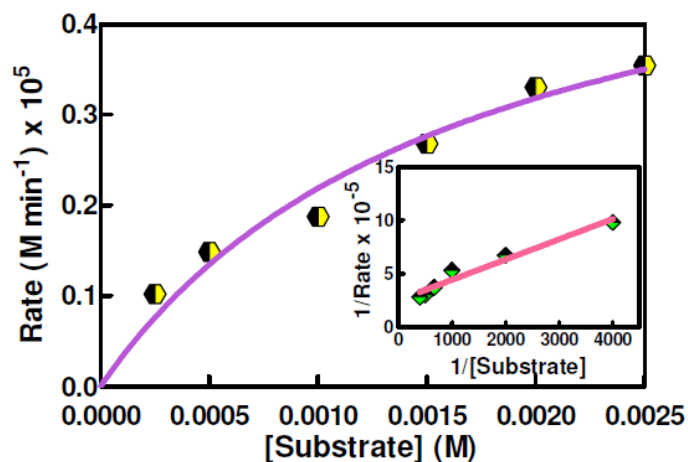

**Fig. S3** Initial rates versus substrate concentration for the 3,5-DTBCH<sub>2</sub> → 3,5-DTBQ oxidation reaction catalyzed by complex [Cu<sub>4</sub>L<sub>2</sub>(μ<sub>3</sub>-OH)<sub>2</sub>(NCO)<sub>4</sub>].2H<sub>2</sub>O (1) in DMF. Inset shows Lineweaver-Burk plot. Symbols and solid lines represent the observed and simulated profiles, respectively.

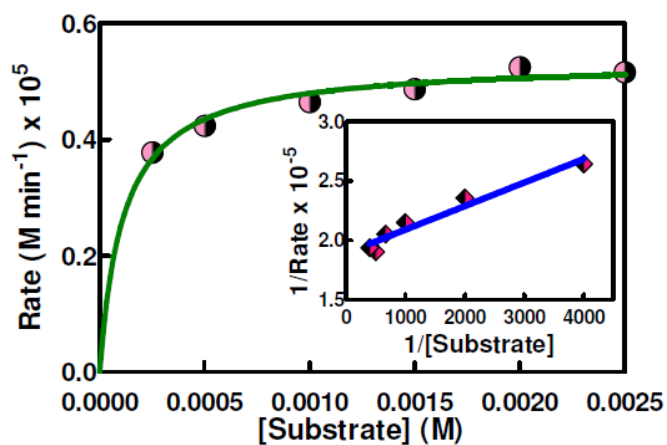

**Fig. S4** Initial rates versus substrate concentration for the 3,5-DTBCH<sub>2</sub> → 3,5-DTBQ oxidation reaction catalyzed by complex [Cu<sub>2</sub>L(μ<sub>1,1</sub>-N<sub>3</sub>)<sub>2</sub>(μ<sub>1,1</sub>-N<sub>3</sub>)<sub>2</sub>(μ<sub>1,3</sub>-N<sub>3</sub>)<sub>2</sub>]<sub>n</sub> (2) in acetonitrile. Inset shows Lineweaver-Burk plot. Symbols and solid lines represent the observed and simulated profiles, respectively.

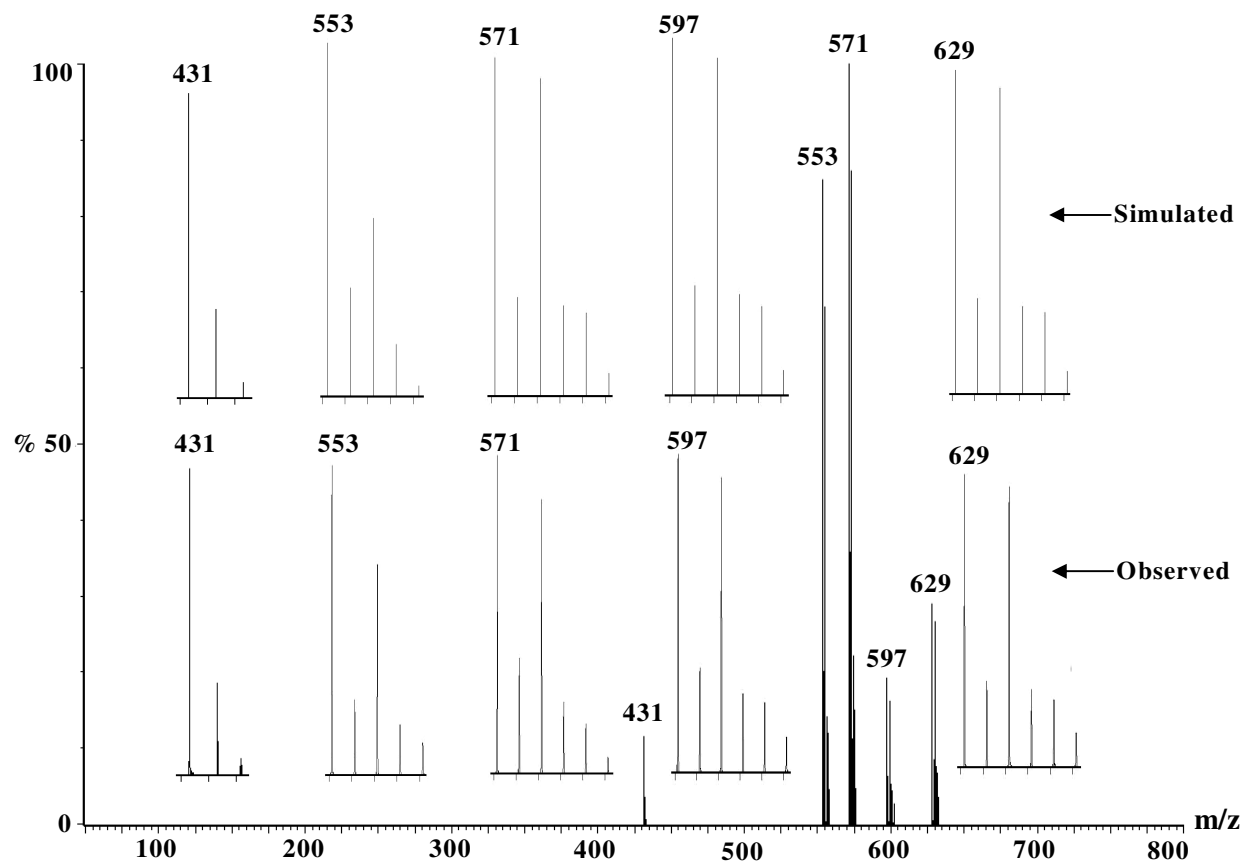

**Fig. S5** Electrospray ionization mass spectrum (ESI-MS positive) of  $[\text{Cu}_4\text{L}_2(\mu_3\text{-OH})_2(\text{NCO})_4]\cdot 2\text{H}_2\text{O}$  (1) in acetonitrile showing observed and simulated isotopic distribution patterns.

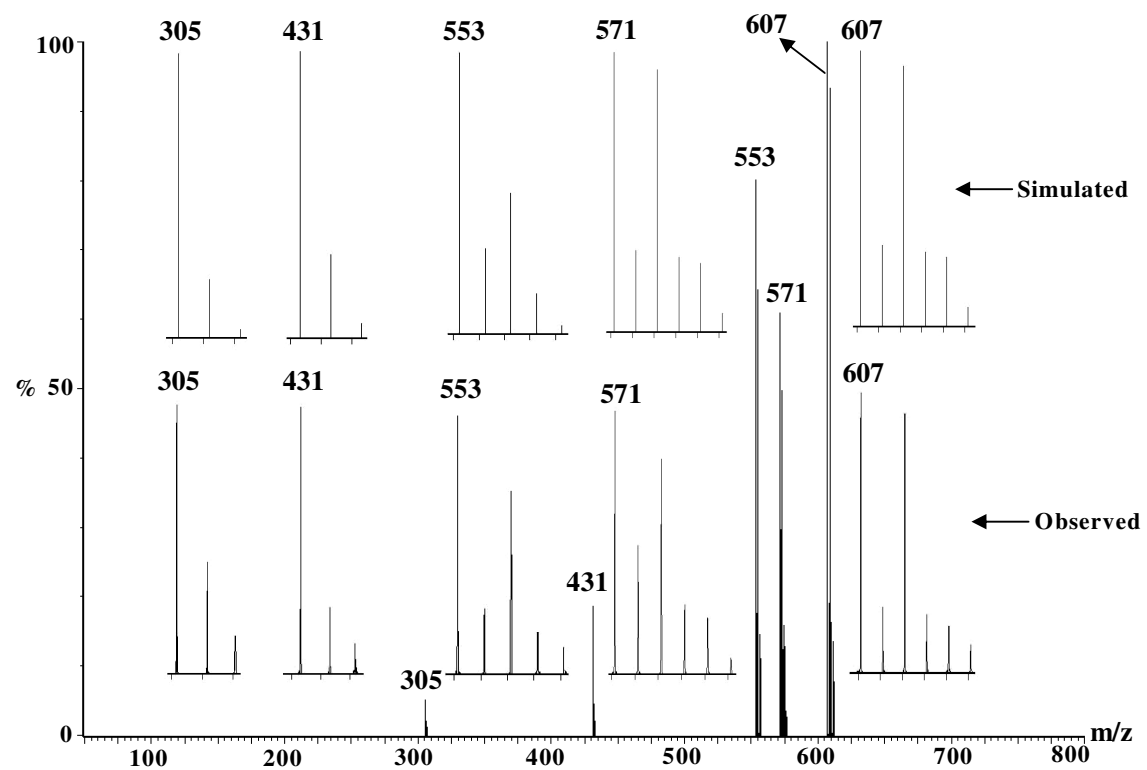

**Fig. S6** Electrospray ionization mass spectrum (ESI-MS positive) of  $[\{Cu^{II}L(\mu_{1,1}-N_3)\}_2(\mu_{1,1}-N_3)_2(\mu_{1,3}-N_3)_2]_n$  (**2**) in acetonitrile showing observed and simulated isotopic distribution patterns.

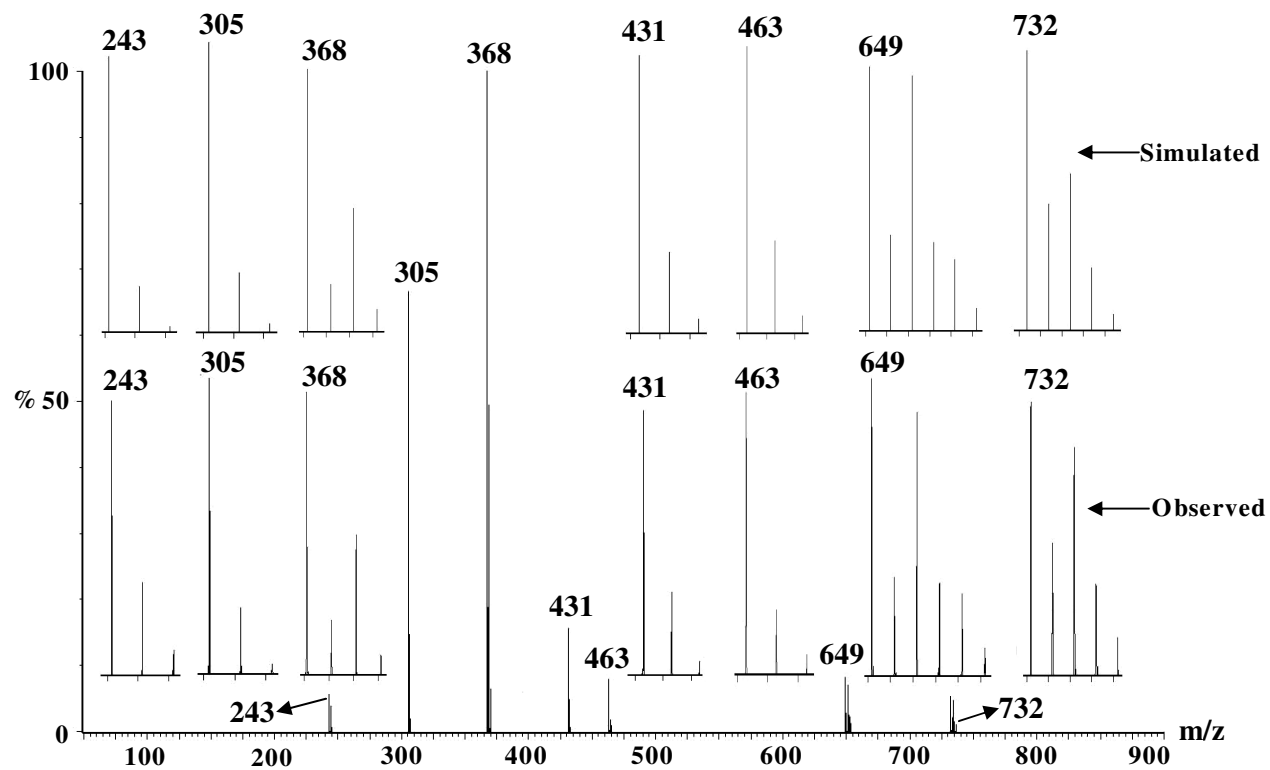

**Fig. S7** Electrospray ionization mass spectrum (ESI-MS positive) of a 1:100 mixture of  $[\text{Cu}_4\text{L}_2(\mu_3\text{-OH})_2(\text{NCO})_4]\cdot 2\text{H}_2\text{O}$  (**1**) and 3,5-DTBC $\text{H}_2$  in acetonitrile, recorded after 10 minutes of mixing. Both the observed and simulated isotopic distribution patterns are shown.

**Table S1** Representative examples copper(II) catalysts for catechol oxidase activity, along with their turnover numbers

| <b>Compound number</b> | <b>Nuclearity</b>                        | <b><math>K_{cat}</math> (<math>h^{-1}</math>)</b> | <b>Reference</b> |
|------------------------|------------------------------------------|---------------------------------------------------|------------------|
| <b>A</b>               | Monocopper(II)                           | 107.9                                             | 1a               |
| <b>B</b>               | Monocopper(II)                           | 111                                               | 1b               |
| <b>C</b>               | Monocopper(II)                           | 27.2                                              | 1a               |
| <b>D</b>               | Monocopper(II)                           | 23.6                                              | 1c               |
| <b>E</b>               | Monocopper(II)                           | 6.0                                               | 1d               |
| <b>F</b>               | Monocopper(II)                           | 4.1                                               | 1e               |
| <b>G</b>               | Monocopper(II)                           | 3.0                                               | 1d               |
| <b>H</b>               | Monocopper(II)                           | 0.2                                               | 1d               |
| <b>J</b>               | Dicopper(II)                             | 2804                                              | 2a               |
| <b>K</b>               | Dicopper(II)                             | 1145                                              | 2b               |
| <b>L</b>               | Dicopper(II)                             | 1127                                              | 2c               |
| <b>M</b>               | Dicopper(II)                             | 900                                               | 2d               |
| <b>N</b>               | Dicopper(II)                             | 236.5                                             | 2e               |
| <b>O</b>               | Dicopper(II)                             | 214                                               | 2f               |
| <b>P</b>               | Dicopper(II)                             | 189                                               | 2g               |
| <b>Q</b>               | Dicopper(II)                             | 167.9                                             | 3a               |
| <b>R</b>               | Dicopper(II)                             | 156.6                                             | 2e               |
| <b>S</b>               | Dicopper(II)                             | 90                                                | 2g               |
| <b>T</b>               | Dicopper(II)                             | 89.1                                              | 3b               |
| <b>U</b>               | Dicopper(II)                             | 48                                                | 2f               |
| <b>V</b>               | Dicopper(II)                             | 43                                                | 2f               |
| <b>W</b>               | Dicopper(II)                             | 41.3                                              | 1e               |
| <b>X</b>               | Dicopper(II)                             | 39.0                                              | 3a               |
| <b>Y</b>               | Dicopper(II)                             | 33                                                | 2f               |
| <b>Z</b>               | Dicopper(II)                             | 26.0                                              | 3c               |
| <b>AA</b>              | Dicopper(II)                             | 23.2                                              | 1e               |
| <b>BB</b>              | Dicopper(II)                             | 18.8                                              | 3b               |
| <b>CC</b>              | Dicopper(II)                             | 12.5                                              | 3d               |
| <b>DD</b>              | Dicopper(II)                             | 11.2                                              | 3e               |
| <b>EE</b>              | Dicopper(II)                             | 3.2                                               | 1e               |
| <b>FF</b>              | Triicopper(II)                           | 572.4                                             | 4a               |
| <b>GG</b>              | Triicopper(II)                           | 80.3                                              | 4b               |
| <b>HH</b>              | Triicopper(II)                           | 16.2                                              | 4c               |
| <b>JJ</b>              | Triicopper(II)                           | 10.4                                              | 4c               |
| <b>KK</b>              | Triicopper(II)                           | 7.5                                               | 1e               |
| <b>LL</b>              | Tetracopper(II)                          | 39.9                                              | 3a               |
| <b>MM</b>              | Tetracopper(II)                          | 19.4                                              | 4c               |
| <b>NN</b>              | Tetracopper(II)                          | 15.8                                              | 4c               |
| <b>OO</b>              | Heptacopper(II) based<br>one-dimensional | 48.2                                              | 3a               |

## References:

- 1 (a) N. Beyazit, D. Çakmak and C. Demetgül, *Tetrahedron*, 2017, **73**, 2774; (b) N. Nanjundan, R. Narayanasamy, R. J. Butcher, J. P. Jasinski, K. Velmurugan, R. Nandhakumar, M. D. Balakumaran, P. T. Kalaichelvan and V. G. Gnanasoundari, *Inorg. Chim. Acta*, 2017, **455**, 283; (c) M. Shyamal, T. K. Mandal, A. Panja and A. Saha, *RSC Adv.*, 2014, **4**, 53520; (d) M. K. Panda, M. M. Shaikh, R. J. Butcher and P. Ghosh, *Inorg. Chim. Acta*, 2011, **372**, 145; (e) V. K. Bhardwaj, N. Aliaga-Alcalde, M. Corbella and G. Hundal, *Inorg. Chim. Acta*, 2010, **363**, 97.
- 2 (a) J. Ackermann, F. Meyer, E. Kaifer and H. Pritzkow, *Chem.-Eur. J.*, 2002, **8**, 247; (b) J. A. F. d. Oliveira, M. P. d. Silva, B. d. Souza, T. P. Camargo, B. Szpoganicz, A. Neves and A. J. Bortoluzzi, *Dalton Trans.*, 2016, **45**, 15294; (c) S. Anbu, E. C. B. A. Alegria and A. J. L. Pombeiro, *Inorg. Chim. Acta*, 2015, **431**, 139; (d) S. J. Smith, C. J. Noble, R. C. Palmer, G. R. Hanson, G. Schenk, L. R. Gahan and M. Riley, *J. Biol. Inorg. Chem.*, 2008, **13**, 499 (e) P. Zerón, M. Westphal, P. Comba, M. Flores-Álamo, A. C. Stueckl, C. Leal-Cervantes, V. M. Ugalde-Saldívar and L. Gasque, *Eur. J. Inorg. Chem.*, 2017, 56; (f) J. Reim and B. Krebs, *J. Chem. Soc., Dalton Trans.*, 1997, 3793; (g) J. Anekwe, A. Hammerschmidt, A. Rompel and B. Krebs, *Z. Anorg. Allg. Chem.*, 2006, **632**, 1057.
- 3 (a) S. Majumder, S. Sarkar, S. Sasmal, E.C. Sañudo and S. Mohanta, *Inorg. Chem.*, 2011, **50**, 7540; (b) S. Sarkar, S. Majumder, L. Carrella, E. Rentschler and S. Mohanta, *Polyhedron*, 2013, **50**, 270; (c) A. Banerjee, R. Singh, E. Colacio and K. K. Rajak, *Eur. J. Inorg. Chem.*, 2009, 277; (d) N. A. Rey, A. Neves, A. J. Bortoluzzi, C. T. Pich and H. Terenzi, *Inorg. Chem.*, 2007, **46**, 348; (e) C. Fernandes, A. Neves, A. J. Bortoluzzi, A. S. Mangrich, E. Rentschler, B. Szpoganicz and E. Schwingel, *Inorg. Chim. Acta*, 2001, **320**, 12.
- 4 (a) A. Szorcsik, F. Matyuska, A. Bényei, N. V. Nagy, R. K. Szilágyi and T. Gajda, *Dalton Trans.*, 2016, **45**, 14998; (b) R. E. H. M. B. Osório, A. Neves, T. P. Camargo, S. L. Mireski, A. J. Bortoluzzi, E. E. Castellano, W. Haase and Z. Tomkowicz, *Inorg. Chim. Acta*, 2015, **435**, 153; (c) S. Calancea, S. G. Reis, G. P. Guedes, R. A. A. Cassaro, F. Semaan, F. López-Ortiz and M. G. F. Vaz, *Inorg. Chim. Acta*, 2016, **453**, 104.
